# Supplementary material
Source: PubMed Central journal article supplement (PMC4305025)

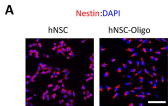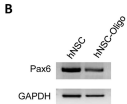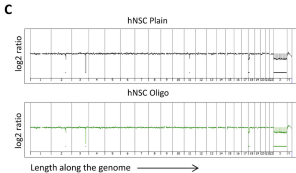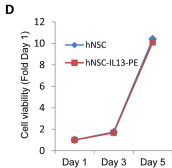

**A**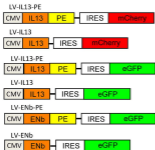**B**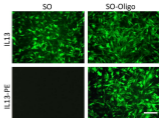**C**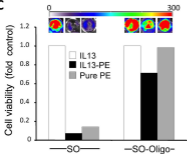**D**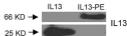**E**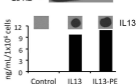

**A**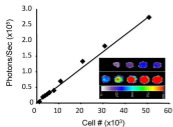**B**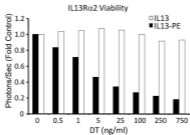**C**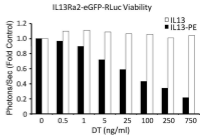**D**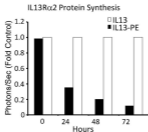**E**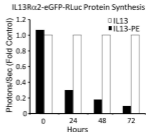

**A**

Implant 293-Oligo-  
IL13-PE/WT + GBM-  
dsLuc-Rluc

Daily Fluc + Rluc imaging →

d0

d1

d2

**B**

G136-IL13Rα2

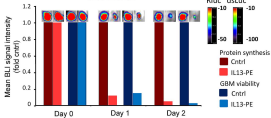**C**

U251

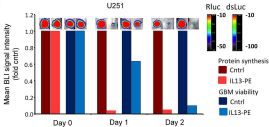

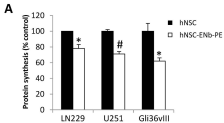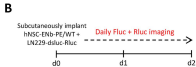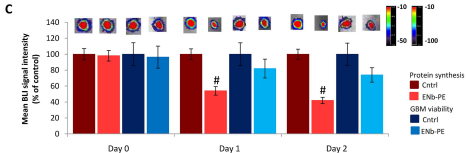

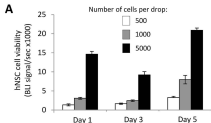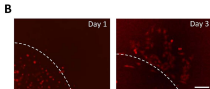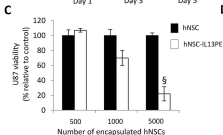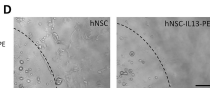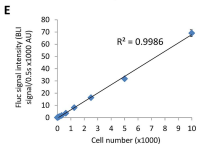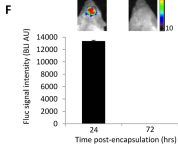

**A**

LV-IL13-Gluc-PE

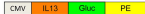**B**IL13-Gluc-PE secretion *in vitro*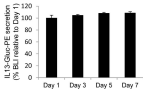**C**IL13-Gluc-PE conditioned medium *in vivo*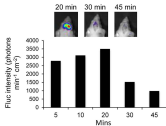**D**Cells secreting IL13-Gluc-PE encapsulated in sECM *in vivo*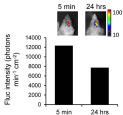

**A****GBM modifications do not affect their response to IL13-PE**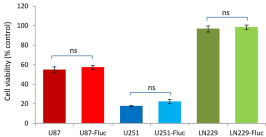

Supplement: NIHMS635906-supplement-Supp_FigureS1-S8.pdf [file NIHMS635906-supplement-Supp_FigureS1-S8.pdf]
